# Supplementary material
Source: publisher site journal article supplement (http://content.karger.com/ProdukteDB/miscArchiv/000/207/446/Suppl.pdf)
Supplement: Supplementary file 1 [file Suppl.pdf]

# WEB BASED ADDENDUM

See text for abbreviations

**Table A Enrollment/Evaluation Protocol**

|                                                                                |                       |
|--------------------------------------------------------------------------------|-----------------------|
| <b>Pre-Enrollment</b>                                                          |                       |
| Consent to review medical records                                              | LSRC                  |
| Initiate entry survey form                                                     | LSRC                  |
| Confirmation of subject's capacity to provide consent                          | Site Director         |
| <b>Phase I</b>                                                                 |                       |
| Consent process completed                                                      | LSRC                  |
| Standard physical and neurological assessment                                  | Site Director         |
| Review of medical records                                                      | LSRC                  |
| Medication history form                                                        | LSRC                  |
| Family history form                                                            | LSRC                  |
| Modified Hachinski Ischemia Scale                                              | Site Director         |
| Geriatric Depression Scale                                                     | LSRC                  |
| Inclusion/exclusion criteria met                                               | Site Director         |
| Laboratory studies or MRI scan to be obtained if not available                 | LSRC                  |
| Semi-structured CDR interview with informant and subject                       | LSRC or Site Director |
| Subject's CDR score and diagnosis established after review of all Phase I data | Site Director         |
| CDR score and diagnosis confirmed (consensus conference as needed)             | Bachman or Mintzer    |
| <b>Phase II</b>                                                                |                       |
| Neuropsychological battery                                                     | CRC                   |
| Functional assessment scales                                                   | CRC                   |
| Collection of biological materials                                             | LSRC                  |
| Life style/risk factor form                                                    | LSRC                  |
| Diet history form                                                              | LSRC                  |
| Neuroimaging studies                                                           | LSRC                  |
| <b>Follow-up</b>                                                               |                       |
| Phone call- follow up every 4 months                                           | LSRC                  |
| <b>Annual Re-Assessment</b>                                                    |                       |
| Updated medical history                                                        | LSRC                  |
| Medical and neurological assessment                                            | Site Director         |
| Diet history                                                                   | LSRC                  |
| Geriatric Depression Scale                                                     | LSRC                  |
| Mini Mental State Exam                                                         | LSRC                  |
| Neuropsychological battery                                                     | CRC                   |
| Functional assessment scales                                                   | CRC                   |
| Semi structured CDR interview with informant and subject                       | LSRC or Site Director |
| Collection of biological materials                                             | LSR                   |

**Table B Description of Standard Clinical Assessment**

|                                                                                                                                                                                                                                                                                                                                                                                                                                                                                                                                                                                                                                                                                                                                                                                                                                                                                                                                                                                                                |
|----------------------------------------------------------------------------------------------------------------------------------------------------------------------------------------------------------------------------------------------------------------------------------------------------------------------------------------------------------------------------------------------------------------------------------------------------------------------------------------------------------------------------------------------------------------------------------------------------------------------------------------------------------------------------------------------------------------------------------------------------------------------------------------------------------------------------------------------------------------------------------------------------------------------------------------------------------------------------------------------------------------|
| <b>Demographic Information</b>                                                                                                                                                                                                                                                                                                                                                                                                                                                                                                                                                                                                                                                                                                                                                                                                                                                                                                                                                                                 |
| Demographic information and other information collected to establish subjects' research diagnosis and includes residential status, education, occupation, age, gender, ethnicity, and marital status.                                                                                                                                                                                                                                                                                                                                                                                                                                                                                                                                                                                                                                                                                                                                                                                                          |
| <b>Medical and Neurological Information</b>                                                                                                                                                                                                                                                                                                                                                                                                                                                                                                                                                                                                                                                                                                                                                                                                                                                                                                                                                                    |
| This assessment includes medical information about the estimated time of disease onset, tempo of disease progression, nature of early and current symptoms, presence and/or absence of complete medical and neurology exams, history of prior diagnostic studies, toxin or alcohol exposure, and comprehensive medication history of prescription, over-the-counter medications, herbal medications & vitamins taken within the last 12 months.                                                                                                                                                                                                                                                                                                                                                                                                                                                                                                                                                                |
| <b>Family History</b>                                                                                                                                                                                                                                                                                                                                                                                                                                                                                                                                                                                                                                                                                                                                                                                                                                                                                                                                                                                          |
| The familial history, especially for first degree relatives, is assessed for dementia, AD, stroke, Parkinson's disease, and other cardiovascular diseases.                                                                                                                                                                                                                                                                                                                                                                                                                                                                                                                                                                                                                                                                                                                                                                                                                                                     |
| <b>Standard Physical and Neurological Examination</b>                                                                                                                                                                                                                                                                                                                                                                                                                                                                                                                                                                                                                                                                                                                                                                                                                                                                                                                                                          |
| The exam includes a general medical exam, vital signs, height, weight, blood pressure (orthostatic), waist circumference, hip circumference, brief sight examination, cranial nerve exam, motor tone and strength, sensation, deep tendon reflexes, tremor, Parkinsonism or other abnormal movements, and gait.                                                                                                                                                                                                                                                                                                                                                                                                                                                                                                                                                                                                                                                                                                |
| <b>Clinical Dementia Rating Scale (CDR)</b>                                                                                                                                                                                                                                                                                                                                                                                                                                                                                                                                                                                                                                                                                                                                                                                                                                                                                                                                                                    |
| The CDR is a well-established, reliable and valid diagnostic and staging measure for dementia of the Alzheimer type based on training and reliability studies in multi-center trials (ref). This measure is widely used in longitudinal and clinical studies to gauge AD progression. When compared to a neurologist using the DSM-III-R to determine if dementia was present, a CDR score of >1 had a sensitivity of 92% and a specificity of 94%. <sup>(ref)</sup> The CDR is a semi-structured interview administered to both patient and informant. Impairment levels are determined in six cognitive-functional categories. The current version and scoring rules are established and now include a semi-structured interview to be used with the Scoring Table. <sup>52</sup> The CDR was the primary instrument utilized for determining control, MCI or dementia status and was videotaped for the purpose of confirming the diagnosis. CDR scoring follows the standard set by Washington University. |
| <b>Mini Mental State Examination (MMSE)</b>                                                                                                                                                                                                                                                                                                                                                                                                                                                                                                                                                                                                                                                                                                                                                                                                                                                                                                                                                                    |
| The current guidelines require an objective psychometric assessment to establish the diagnosis of dementia. Although a number of options are available, the MMSE was selected. The MMSE <sup>53</sup> is the most widely used, brief mental status exam in the world. Although it has a number of limitations, it has been used in a variety of research and clinical settings. The MMSE was selected given the familiarity of the sites with the scale and the well-established psychometric properties of the instrument.                                                                                                                                                                                                                                                                                                                                                                                                                                                                                    |
| <b>Evaluation of Depression</b>                                                                                                                                                                                                                                                                                                                                                                                                                                                                                                                                                                                                                                                                                                                                                                                                                                                                                                                                                                                |
| Depression was assessed using the clinical criteria established by the APA Diagnostic and Statistical Manual IVth edition revised (DSM-IV-R) The Site Director or LSRC will also administer the Geriatric Depression Scale (GDS) <sup>54</sup> as required by UDS. Subjects meeting criteria for major depressive disorder by DSM-IV criteria as determined by the Site Director were excluded from inclusion in the ADCC and were reassessed after successful treatment. The GDS score was used as a reference for the Site Director but was not the determining factor in assessing the presence or absence of major depression.                                                                                                                                                                                                                                                                                                                                                                             |
| <b>Modified Hachinski Ischemia Scale (mHIS)</b>                                                                                                                                                                                                                                                                                                                                                                                                                                                                                                                                                                                                                                                                                                                                                                                                                                                                                                                                                                |
| As modified by Rosen et al., <sup>55</sup> the mHIS has good sensitivity at identifying patients with vascular dementia in autopsy studies. <sup>56</sup> The mHIS was not be used as a diagnostic measure but as reference information for the local Site Director.                                                                                                                                                                                                                                                                                                                                                                                                                                                                                                                                                                                                                                                                                                                                           |
| <b>Laboratory Studies</b>                                                                                                                                                                                                                                                                                                                                                                                                                                                                                                                                                                                                                                                                                                                                                                                                                                                                                                                                                                                      |
| Laboratory studies were obtained consistent with the recommendations of the evidenced based review of the American Academy of Neurology <sup>57</sup> . They included TSH; metabolic battery to include AST, ALT, BUN, Cr, electrolytes; and B12/folate. In most cases, laboratory studies were already available for dementia cases and many MCI cases. When laboratory data were not available (or is more than 1 year old) updated laboratory studies are obtained.                                                                                                                                                                                                                                                                                                                                                                                                                                                                                                                                         |
| <b>Logical Memory IIA (WMSR)</b>                                                                                                                                                                                                                                                                                                                                                                                                                                                                                                                                                                                                                                                                                                                                                                                                                                                                                                                                                                               |
| This is a measure of delayed recall (episodic memory) of a story read to the subject at the beginning of the memory testing. The primary measure of performance is the number of story units recalled. The scoring is adjusted for level of education. The specific cutoff score for the WMS-R <sup>58</sup> was taken from the ADNI in order to differentiate amnesic MCI from non-amnesic MCI.                                                                                                                                                                                                                                                                                                                                                                                                                                                                                                                                                                                                               |
| <b>Neuroimaging for Diagnostic Purposes</b>                                                                                                                                                                                                                                                                                                                                                                                                                                                                                                                                                                                                                                                                                                                                                                                                                                                                                                                                                                    |
| Existing neuroimaging studies obtained by a clinician to confirm a clinical diagnosis of AD, were used for research diagnostic purposes. Although imaging studies were available on almost all dementia cases, they were rarely available for MCI or control cases.                                                                                                                                                                                                                                                                                                                                                                                                                                                                                                                                                                                                                                                                                                                                            |

**Table C Subject characteristics by race**

|                  | Control   |          | AD         |            | MCI        |           |
|------------------|-----------|----------|------------|------------|------------|-----------|
|                  | Black     | White    | Black      | White      | Black      | White     |
|                  | 31(77.5%) | 9(22.5%) | 23(67.6%)  | 11(32.3%)  | 15(57.6%)  | 11(42.3%) |
| Gender           |           |          |            |            |            |           |
| Male             | 11(35.4%) | 5(55.5%) | 6(26.0%)   | 7(63.6%)   | 8(53.3%)   | 3(27.2%)  |
| Female           | 20(64.5%) | 4(44.4%) | 17(73.9%)  | 4(36.3%)   | 7(46.6%)   | 8(72.7%)  |
| Age              |           |          |            |            |            |           |
| <64              | 6(19.3%)  | 3(33.3%) | 2( 8.7%)   | 0( 0.0%)   | 2(13.3%)   | 2(18.1%)  |
| 65-74            | 19(61.2%) | 3(33.3%) | 4(17.3%)   | 6(54.5%)   | 9(60.0%)   | 4(36.3%)  |
| 75-84            | 5(16.1%)  | 1(11.1%) | 13(56.5%)  | 4(36.3%)   | 3(20.0%)   | 5(45.4%)  |
| 85+              | 1( 3.2%)  | 2(22.2%) | 4(17.3%)   | 1( 9.0%)   | 1( 6.6%)   | 0( 0.0%)  |
| Living status    |           |          |            |            |            |           |
| Alone            | 10(32.2%) | 2(22.2%) | 1( 4.3%)   | 1( 9.0%)   | 2(13.3%)   | 2(18.1%)  |
| Assisted         | 21(67.7%) | 7(77.7%) | 22(95.6%)  | 10(90.9%)  | 13(86.6%)  | 9(81.8%)  |
| Residence status |           |          |            |            |            |           |
| Home             | 30(96.7%) | 8(88.8%) | 23(100.0%) | 11(100.0%) | 15(100.0%) | 9(81.8%)  |
| Facility         | 1( 3.2%)  | 1(11.1%) | 0( 0.0%)   | 0( 0.0%)   | 0( 0.0%)   | 2(18.1%)  |
| Clinic location  |           |          |            |            |            |           |
| MUSC/VA          | 12(38.7%) | 3(33.3%) | 9(39.1%)   | 4(36.3%)   | 9(60.0%)   | 5(45.4%)  |
| Other            | 19(61.2%) | 6(66.6%) | 14(60.8%)  | 7(63.6%)   | 6(40.0%)   | 6(54.5%)  |
| Marital Status   |           |          |            |            |            |           |
| Married          | 16(51.6%) | 6(66.6%) | 8(34.7%)   | 10(90.9%)  | 10(66.6%)  | 7(63.6%)  |
| Unmarried        | 15(48.3%) | 3(33.3%) | *15(65.2%) | 1( 9.0%)   | 5(33.3%)   | 4(36.3%)  |
| Environment      |           |          |            |            |            |           |
| Rural            | 13(41.9%) | 5(55.5%) | 16(69.5%)  | 5(45.4%)   | 7(46.6%)   | 5(45.4%)  |
| City             | 17(54.8%) | 4(44.4%) | 5(21.7%)   | 5(45.4%)   | 6(40.0%)   | 5(45.4%)  |
| Other            | 1( 3.2%)  | 0( 0.0%) | 2( 8.7%)   | 1( 9.0%)   | 2(13.3%)   | 1( 9.0%)  |
|                  | Median    | Median   | Median     | Median     | Median     | Median    |
| Age              | 70.0      | 66.0     | 78.0       | 74.0       | 70.0       | 73.0      |
| Education        | 13.0      | 15.0     | *11.0      | 12.0       | 13.0       | 14.0      |
| CDR Score        | 0.0       | 0.0      | 2.0        | 2.0        | 0.5        | 0.5       |
| Sum of Boxes     | 0.0       | 0.0      | 9.0        | 6.5        | 1.0        | 1.5       |

\* denotes a difference between AA and whites at  $p < .01$
